# Supplementary material for: Morphology-controllable synthesis of MnO2 hollow nanospheres and their supercapacitive performance
Source: Royal Society of Chemistry journal article supplement (doi:10.1039/c2nj40880e), 2012-12-18
Supplement: c2nj40880e.pdf [file c2nj40880e.pdf]

## Supporting Information

### Morphology-controllable synthesis of $\text{MnO}_2$ hollow nanospheres and their supercapacitive performance

Jingping Ma<sup>a</sup>, Qilin Cheng<sup>a,b,\*</sup>, Vladimir Pavlinek<sup>b</sup>, Petr Saha<sup>b</sup>, Chunzhong Li<sup>a,\*</sup>

<sup>a</sup> Key Laboratory for Ultrafine Materials of Ministry of Education, School of Materials Science and Engineering, East China University of Science and Technology, 200237, Shanghai, China. Fax: +86 21 6425 0624; Tel: +86 21 6425 0949; E-mail: chengql@ecust.edu.cn; czli@ecust.edu.cn

<sup>b</sup> Centre of Polymer Systems, Polymer Centre, Tomas Bata University in Zlin, nam. T. G. Masaryka 5555, 760 01, Zlin, Czech Republic.

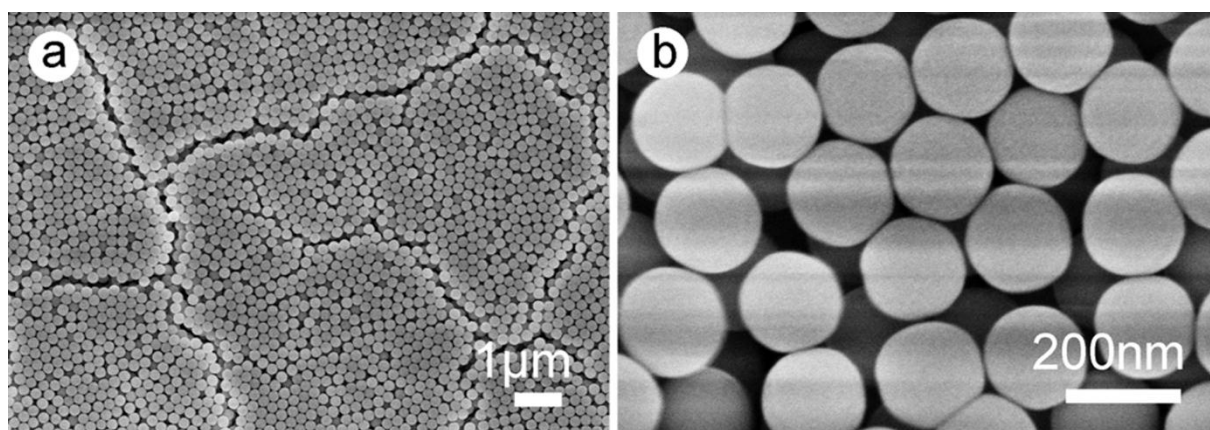

**Fig. S1** (a, b) SEM images of silica spheres using as hard template

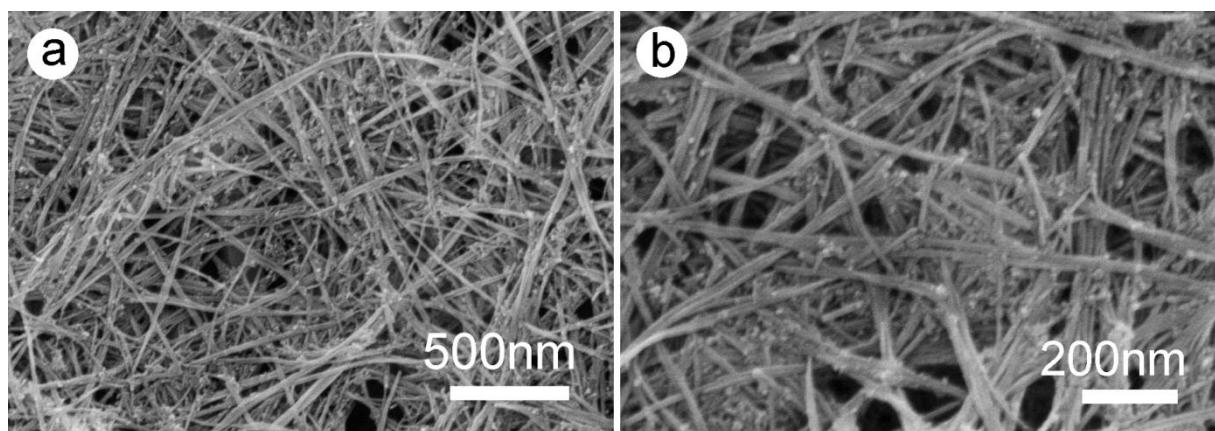

**Fig. S2** (a, b) SEM images of  $\text{MnO}_2$  nanofibers

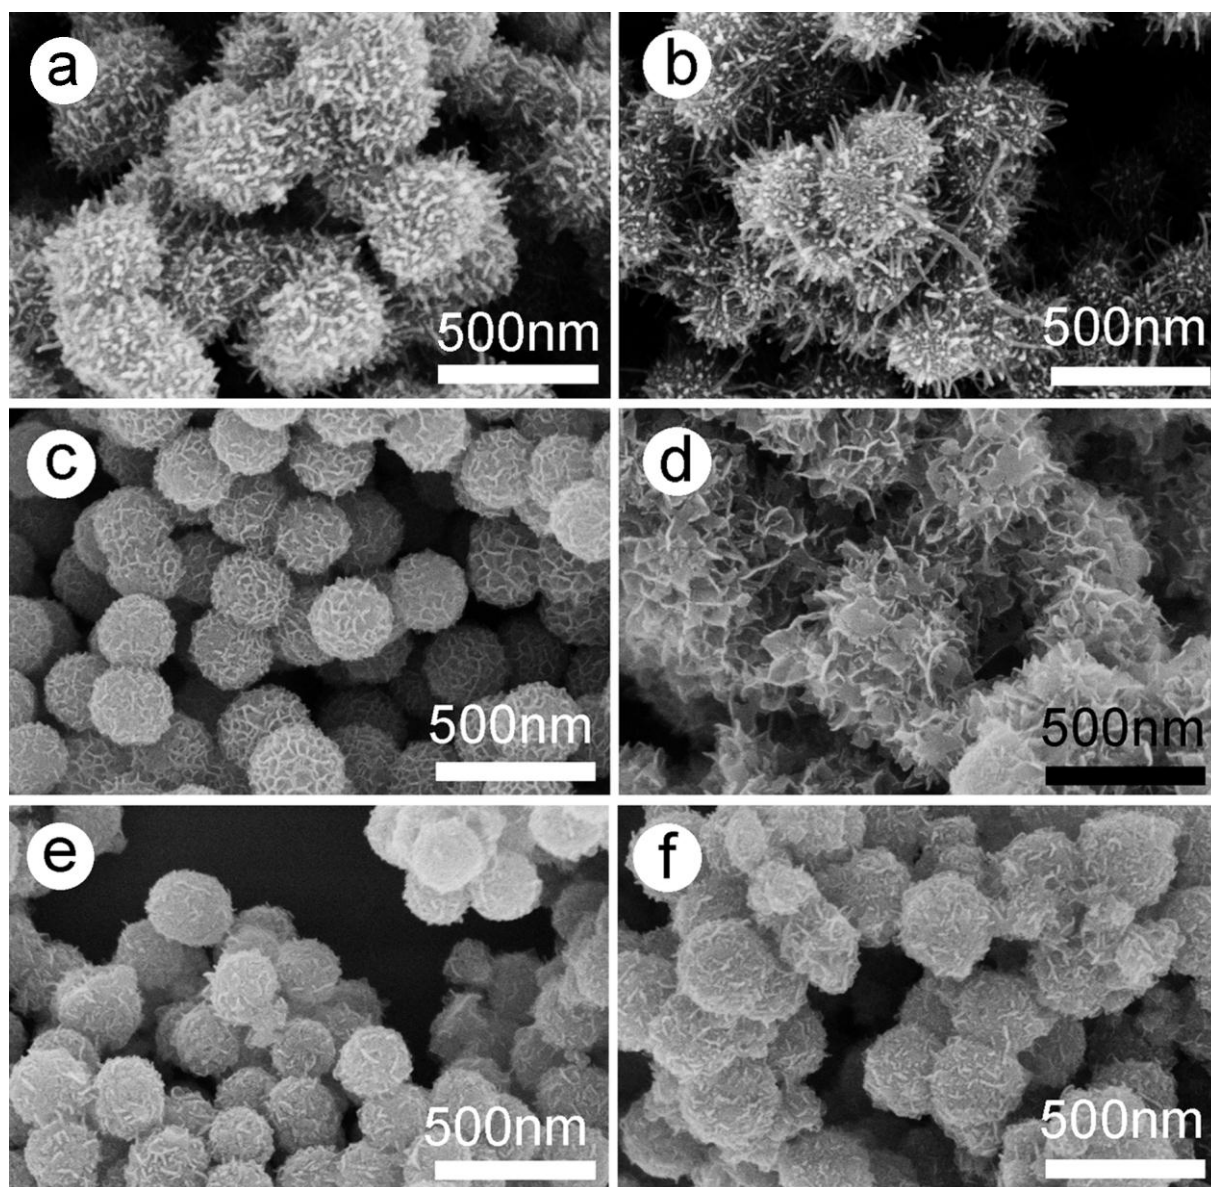

**Fig. S3** SEM images of urchin-like  $\text{MnO}_2$  prepared as the mass ratio of  $\text{KMnO}_4$  to  $\text{SiO}_2$  is (a) 0.5, (b) 1.5; SEM images of flower-like  $\text{MnO}_2$  prepared as the mass ratio of  $\text{KMnO}_4$  to  $\text{SiO}_2$  is (c) 0.5, (d) 1.5; SEM images of non-hierarchical  $\text{MnO}_2$  prepared as the mass ratio of  $\text{KMnO}_4$  to  $\text{SiO}_2$  is (e) 0.5, (f) 1.5.
